# Supplementary material
Source: PubMed Central journal article supplement (PMC2874631)
Supplement: NIHMS74529-supplement-supplement_1.pdf [file NIHMS74529-supplement-supplement_1.pdf]

SUPPLEMENTARY TABLE. An analysis of comet parameters in cell lines from men diagnosed with nonseminoma compared to seminoma (referent group) adjusted for treatment

| Comet parameter                       | Nonseminoma vs. Seminoma |                 |                         |               |         |
|---------------------------------------|--------------------------|-----------------|-------------------------|---------------|---------|
|                                       | Seminoma (n)             | Nonseminoma (n) | Odds ratio <sup>¶</sup> | 95% CI        | p value |
| Tail DNA <sup>†</sup> (%)             |                          |                 |                         |               |         |
| 4.2 - 7.7                             | 21                       | 20              | 1.00                    | Referent      |         |
| 7.8 - 9.4                             | 9                        | 17              | 28.87                   | 2.49 - 334.71 | 0.007   |
| 9.5 - 13.7                            | 11                       | 20              | 25.82                   | 4.07 - 163.96 | 0.0006  |
| <i>p for trend</i>                    |                          |                 | <i>0.0005</i>           |               |         |
| Tail length (µm)                      |                          |                 |                         |               |         |
| 12.1 - 32.1                           | 21                       | 28              | 1.00                    | Referent      |         |
| 32.2 - 34.8                           | 11                       | 9               | 1.22                    | 0.30 - 4.96   | 0.78    |
| 34.9 - 45.8                           | 9                        | 20              | 3.15                    | 0.79 - 12.65  | 0.11    |
| <i>p for trend</i>                    |                          |                 | <i>0.14</i>             |               |         |
| Comet distributed moment <sup>‡</sup> |                          |                 |                         |               |         |
| 14.6 - 20.1                           | 18                       | 28              | 1.00                    | Referent      |         |
| 20.2 - 21.7                           | 12                       | 15              | 2.70                    | 0.54 - 13.50  | 0.23    |
| 21.8 - 27.7                           | 11                       | 14              | 0.28                    | 0.057 - 1.41  | 0.12    |
| <i>p for trend</i>                    |                          |                 | <i>0.14</i>             |               |         |
| Olive tail moment <sup>†</sup>        |                          |                 |                         |               |         |
| 1.0 - 1.8                             | 22                       | 22              | 1.00                    | Referent      |         |
| 1.9 - 2.2                             | 9                        | 16              | 8.66                    | 1.27 - 59.09  | 0.028   |
| 2.3 - 3.6                             | 10                       | 19              | 12.50                   | 2.86 - 54.69  | 0.0008  |
| <i>p for trend</i>                    |                          |                 | <i>0.0007</i>           |               |         |

<sup>†</sup>adjusted for date of cell harvest

<sup>‡</sup>adjusted for date of electrophoresis

<sup>¶</sup>adjusted for radiotherapy and chemotherapy
